# Supplementary material for: Association between Flavonoid Intake and Cognitive Executive Function among African American and White Adults in the Healthy Aging in Neighborhoods of Diversity across the Life Span (HANDLS) Study
Source: MDPI journal article supplement (doi:10.3390/nu16091360), 2024-04-30
Supplement: s1 [file s1]

**Table S1. Association<sup>a</sup> between visit 1 flavonoid intake and ln(TMT-A) for White study participants, HANDLS 2004-2020.**

|                                                                                                                   | Basic Model <sup>b</sup> |               |         | Demographic Model <sup>c</sup> |               |         | Lifestyle Model <sup>d</sup> |               |         | Clinical Model <sup>e</sup> |               |         |
|-------------------------------------------------------------------------------------------------------------------|--------------------------|---------------|---------|--------------------------------|---------------|---------|------------------------------|---------------|---------|-----------------------------|---------------|---------|
|                                                                                                                   | $\hat{\beta}$            | $\pm$ SE      | p-value | $\hat{\beta}$                  | $\pm$ SE      | p-value | $\hat{\beta}$                | $\pm$ SE      | p-value | $\hat{\beta}$               | $\pm$ SE      | p-value |
| <i>Flavonoid Main Effect: Association between visit 1 flavonoid intake and visit 1 ln(TMT-A)</i>                  |                          |               |         |                                |               |         |                              |               |         |                             |               |         |
| Total Flavonoids                                                                                                  | 0.00000                  | $\pm$ 0.00019 | 0.985   | 0.00009                        | $\pm$ 0.00018 | 0.621   | 0.00012                      | $\pm$ 0.00018 | 0.520   | 0.00003                     | $\pm$ 0.00018 | 0.860   |
| Flavones                                                                                                          | -0.12931                 | $\pm$ 0.11346 | 0.255   | 0.01560                        | $\pm$ 0.10762 | 0.885   | 0.06186                      | $\pm$ 0.10835 | 0.568   | 0.01463                     | $\pm$ 0.10702 | 0.891   |
| Flavonols                                                                                                         | -0.00341                 | $\pm$ 0.00515 | 0.508   | 0.00075                        | $\pm$ 0.00480 | 0.876   | 0.00300                      | $\pm$ 0.00484 | 0.535   | -0.00020                    | $\pm$ 0.00479 | 0.966   |
| Flavonones                                                                                                        | -0.00463                 | $\pm$ 0.00614 | 0.450   | -0.00362                       | $\pm$ 0.00578 | 0.531   | -0.00188                     | $\pm$ 0.00580 | 0.745   | -0.00330                    | $\pm$ 0.00576 | 0.567   |
| Flavan-3-ols                                                                                                      | 0.00002                  | $\pm$ 0.00020 | 0.901   | 0.00011                        | $\pm$ 0.00019 | 0.566   | 0.00013                      | $\pm$ 0.00019 | 0.491   | 0.00005                     | $\pm$ 0.00019 | 0.807   |
| Anthocyanidins                                                                                                    | -0.01383                 | $\pm$ 0.00568 | 0.015   | -0.00827                       | $\pm$ 0.00545 | 0.129   | -0.00692                     | $\pm$ 0.00547 | 0.206   | -0.00785                    | $\pm$ 0.00544 | 0.149   |
| <i>Flavonoid*Time Interaction: Association between visit 1 flavonoid intake and change in ln(TMT-A) over time</i> |                          |               |         |                                |               |         |                              |               |         |                             |               |         |
| Total Flavonoids                                                                                                  | -0.00001                 | $\pm$ 0.00002 | 0.618   | -0.00002                       | $\pm$ 0.00002 | 0.531   | -0.00002                     | $\pm$ 0.00002 | 0.529   | -0.00001                    | $\pm$ 0.00002 | 0.702   |
| Flavones                                                                                                          | -0.03148                 | $\pm$ 0.01504 | 0.037   | -0.03107                       | $\pm$ 0.01496 | 0.038   | -0.03172                     | $\pm$ 0.01497 | 0.034   | -0.02892                    | $\pm$ 0.01493 | 0.053   |
| Flavonols                                                                                                         | -0.00045                 | $\pm$ 0.00065 | 0.488   | -0.00052                       | $\pm$ 0.00065 | 0.421   | -0.00053                     | $\pm$ 0.00065 | 0.417   | -0.00037                    | $\pm$ 0.00065 | 0.563   |
| Flavonones                                                                                                        | 0.00051                  | $\pm$ 0.00087 | 0.562   | 0.00049                        | $\pm$ 0.00087 | 0.573   | 0.00043                      | $\pm$ 0.00087 | 0.618   | 0.00047                     | $\pm$ 0.00086 | 0.586   |
| Flavan-3-ols                                                                                                      | -0.00001                 | $\pm$ 0.00003 | 0.625   | -0.00002                       | $\pm$ 0.00003 | 0.545   | -0.00002                     | $\pm$ 0.00003 | 0.545   | -0.00001                    | $\pm$ 0.00003 | 0.713   |
| Anthocyanidins                                                                                                    | 0.00002                  | $\pm$ 0.00061 | 0.976   | -0.00017                       | $\pm$ 0.00061 | 0.781   | -0.00018                     | $\pm$ 0.00061 | 0.763   | -0.00012                    | $\pm$ 0.00061 | 0.841   |

Abbreviations: TMT, Trail Making Test; SE, Standard Error.

<sup>a</sup>Associations are reported for a 10-unit increment in visit 1 flavonoid intake.

<sup>b</sup>Basic Model includes fixed effects for visit 1 flavonoid intake, time, and visit 1 flavonoid intake\*time.

<sup>c</sup>Demographic Model is the Basic Model adjusted for visit 1 age in years, age-squared, sex, race, poverty status, education in years, and Wide Range Achievement Test (WRAT) scores.

<sup>d</sup>Lifestyle Model is the Demographic Model adjusted for current smoking status, current drug use, and total energy intake at visit 1.

<sup>e</sup>Clinical Model is the Demographic Model adjusted for diabetes, hypertension, high cholesterol, the Center for Epidemiologic Studies Depression Scale (CES-D), and body mass index (BMI).

**Table S2. Association<sup>a</sup> between visit 1 flavonoid intake and ln(TMT-A) for African American study participants, HANDLS 2004-2020.**

|                                                                                                                   | Basic Model <sup>b</sup> |               |         | Demographic Model <sup>c</sup> |               |         | Lifestyle Model <sup>d</sup> |               |         | Clinical Model <sup>e</sup> |               |         |
|-------------------------------------------------------------------------------------------------------------------|--------------------------|---------------|---------|--------------------------------|---------------|---------|------------------------------|---------------|---------|-----------------------------|---------------|---------|
|                                                                                                                   | $\hat{\beta}$            | $\pm$ SE      | p-value | $\hat{\beta}$                  | $\pm$ SE      | p-value | $\hat{\beta}$                | $\pm$ SE      | p-value | $\hat{\beta}$               | $\pm$ SE      | p-value |
| <i>Flavonoid Main Effect: Association between visit 1 flavonoid intake and visit 1 ln(TMT-A)</i>                  |                          |               |         |                                |               |         |                              |               |         |                             |               |         |
| Total Flavonoids                                                                                                  | -0.00016                 | $\pm$ 0.00046 | 0.733   | 0.00009                        | $\pm$ 0.00042 | 0.837   | 0.00017                      | $\pm$ 0.00042 | 0.686   | 0.00012                     | $\pm$ 0.00042 | 0.783   |
| Flavones                                                                                                          | 0.05521                  | $\pm$ 0.16015 | 0.730   | 0.18620                        | $\pm$ 0.14808 | 0.209   | 0.23777                      | $\pm$ 0.14885 | 0.110   | 0.18686                     | $\pm$ 0.14720 | 0.204   |
| Flavonols                                                                                                         | -0.00103                 | $\pm$ 0.00908 | 0.910   | 0.00039                        | $\pm$ 0.00843 | 0.963   | 0.00809                      | $\pm$ 0.00873 | 0.354   | 0.00153                     | $\pm$ 0.00838 | 0.855   |
| Flavonones                                                                                                        | -0.00577                 | $\pm$ 0.00416 | 0.166   | -0.00435                       | $\pm$ 0.00383 | 0.256   | -0.00306                     | $\pm$ 0.00386 | 0.428   | -0.00415                    | $\pm$ 0.00381 | 0.276   |
| Flavan-3-ols                                                                                                      | -0.00009                 | $\pm$ 0.00048 | 0.843   | 0.00013                        | $\pm$ 0.00044 | 0.765   | 0.00017                      | $\pm$ 0.00044 | 0.694   | 0.00016                     | $\pm$ 0.00044 | 0.721   |
| Anthocyanidins                                                                                                    | 0.00083                  | $\pm$ 0.00760 | 0.913   | 0.00159                        | $\pm$ 0.00698 | 0.820   | 0.00455                      | $\pm$ 0.00704 | 0.518   | 0.00215                     | $\pm$ 0.00695 | 0.757   |
| <i>Flavonoid*Time Interaction: Association between visit 1 flavonoid intake and change in ln(TMT-A) over time</i> |                          |               |         |                                |               |         |                              |               |         |                             |               |         |
| Total Flavonoids                                                                                                  | 0.00004                  | $\pm$ 0.00006 | 0.498   | 0.00003                        | $\pm$ 0.00006 | 0.612   | 0.00003                      | $\pm$ 0.00006 | 0.588   | 0.00002                     | $\pm$ 0.00006 | 0.744   |
| Flavones                                                                                                          | -0.00980                 | $\pm$ 0.01879 | 0.602   | -0.01346                       | $\pm$ 0.01861 | 0.469   | -0.01555                     | $\pm$ 0.01863 | 0.404   | -0.01533                    | $\pm$ 0.01864 | 0.411   |
| Flavonols                                                                                                         | 0.00126                  | $\pm$ 0.00114 | 0.270   | 0.00118                        | $\pm$ 0.00113 | 0.294   | 0.00121                      | $\pm$ 0.00113 | 0.284   | 0.00090                     | $\pm$ 0.00113 | 0.424   |
| Flavonones                                                                                                        | -0.00040                 | $\pm$ 0.00051 | 0.435   | -0.00055                       | $\pm$ 0.00051 | 0.276   | -0.00056                     | $\pm$ 0.00051 | 0.269   | -0.00053                    | $\pm$ 0.00051 | 0.296   |
| Flavan-3-ols                                                                                                      | 0.00005                  | $\pm$ 0.00006 | 0.443   | 0.00004                        | $\pm$ 0.00006 | 0.528   | 0.00004                      | $\pm$ 0.00006 | 0.506   | 0.00003                     | $\pm$ 0.00006 | 0.661   |
| Anthocyanidins                                                                                                    | -0.00006                 | $\pm$ 0.00079 | 0.940   | -0.00004                       | $\pm$ 0.00078 | 0.961   | -0.00004                     | $\pm$ 0.00078 | 0.958   | -0.00002                    | $\pm$ 0.00078 | 0.981   |

Abbreviations: TMT, Trail Making Test; SE, Standard Error.

<sup>a</sup>Associations are reported for a 10-unit increment in visit 1 flavonoid intake.

<sup>b</sup>Basic Model includes fixed effects for visit 1 flavonoid intake, time, and visit 1 flavonoid intake\*time.

<sup>c</sup>Demographic Model is the Basic Model adjusted for visit 1 age in years, age-squared, sex, race, poverty status, education in years, and Wide Range Achievement Test (WRAT) scores.

<sup>d</sup>Lifestyle Model is the Demographic Model adjusted for current smoking status, current drug use, and total energy intake at visit 1.

<sup>e</sup>Clinical Model is the Demographic Model adjusted for diabetes, hypertension, high cholesterol, the Center for Epidemiologic Studies Depression Scale (CES-D), and body mass index (BMI).

**Table S3. Association<sup>a</sup> between visit 1 flavonoid intake and ln(TMT-A) for all study participants 50+ years, HANDLS 2004-2020.**

|                                                                                                                   | Basic Model <sup>b</sup> |               |         | Demographic Model <sup>c</sup> |               |         | Lifestyle Model <sup>d</sup> |               |         | Clinical Model <sup>e</sup> |               |         |
|-------------------------------------------------------------------------------------------------------------------|--------------------------|---------------|---------|--------------------------------|---------------|---------|------------------------------|---------------|---------|-----------------------------|---------------|---------|
|                                                                                                                   | $\hat{\beta}$            | $\pm$ SE      | p-value | $\hat{\beta}$                  | $\pm$ SE      | p-value | $\hat{\beta}$                | $\pm$ SE      | p-value | $\hat{\beta}$               | $\pm$ SE      | p-value |
| <i>Flavonoid Main Effect: Association between visit 1 flavonoid intake and visit 1 ln(TMT-A)</i>                  |                          |               |         |                                |               |         |                              |               |         |                             |               |         |
| Total Flavonoids                                                                                                  | -0.00087                 | $\pm$ 0.00034 | 0.010   | -0.00022                       | $\pm$ 0.00031 | 0.488   | -0.00015                     | $\pm$ 0.00031 | 0.627   | -0.00027                    | $\pm$ 0.00031 | 0.385   |
| Flavones                                                                                                          | -0.24376                 | $\pm$ 0.15976 | 0.127   | 0.10282                        | $\pm$ 0.15042 | 0.494   | 0.17461                      | $\pm$ 0.15118 | 0.248   | 0.11087                     | $\pm$ 0.14926 | 0.458   |
| Flavonols                                                                                                         | -0.01972                 | $\pm$ 0.00790 | 0.013   | -0.00456                       | $\pm$ 0.00737 | 0.536   | 0.00091                      | $\pm$ 0.00751 | 0.903   | -0.00419                    | $\pm$ 0.00730 | 0.567   |
| Flavonones                                                                                                        | -0.00381                 | $\pm$ 0.00553 | 0.491   | -0.00345                       | $\pm$ 0.00511 | 0.499   | -0.00103                     | $\pm$ 0.00516 | 0.843   | -0.00305                    | $\pm$ 0.00506 | 0.547   |
| Flavan-3-ols                                                                                                      | -0.00084                 | $\pm$ 0.00035 | 0.017   | -0.00022                       | $\pm$ 0.00033 | 0.506   | -0.00018                     | $\pm$ 0.00032 | 0.588   | -0.00028                    | $\pm$ 0.00032 | 0.389   |
| Anthocyanidins                                                                                                    | -0.01581                 | $\pm$ 0.00627 | 0.012   | -0.00224                       | $\pm$ 0.00586 | 0.702   | 0.00058                      | $\pm$ 0.00590 | 0.922   | -0.00132                    | $\pm$ 0.00582 | 0.820   |
| <i>Flavonoid*Time Interaction: Association between visit 1 flavonoid intake and change in ln(TMT-A) over time</i> |                          |               |         |                                |               |         |                              |               |         |                             |               |         |
| Total Flavonoids                                                                                                  | 0.00006                  | $\pm$ 0.00005 | 0.211   | 0.00005                        | $\pm$ 0.00005 | 0.251   | 0.00006                      | $\pm$ 0.00005 | 0.206   | 0.00005                     | $\pm$ 0.00005 | 0.250   |
| Flavones                                                                                                          | -0.01341                 | $\pm$ 0.02265 | 0.554   | -0.01604                       | $\pm$ 0.02250 | 0.476   | -0.01633                     | $\pm$ 0.02250 | 0.468   | -0.01346                    | $\pm$ 0.02252 | 0.550   |
| Flavonols                                                                                                         | 0.00099                  | $\pm$ 0.00112 | 0.377   | 0.00088                        | $\pm$ 0.00111 | 0.425   | 0.00099                      | $\pm$ 0.00111 | 0.372   | 0.00077                     | $\pm$ 0.00111 | 0.489   |
| Flavonones                                                                                                        | -0.00035                 | $\pm$ 0.00071 | 0.618   | -0.00055                       | $\pm$ 0.00070 | 0.431   | -0.00055                     | $\pm$ 0.00070 | 0.430   | -0.00054                    | $\pm$ 0.00070 | 0.435   |
| Flavan-3-ols                                                                                                      | 0.00007                  | $\pm$ 0.00005 | 0.161   | 0.00006                        | $\pm$ 0.00005 | 0.191   | 0.00007                      | $\pm$ 0.00005 | 0.156   | 0.00006                     | $\pm$ 0.00005 | 0.192   |
| Anthocyanidins                                                                                                    | -0.00040                 | $\pm$ 0.00063 | 0.519   | -0.00053                       | $\pm$ 0.00063 | 0.401   | -0.00052                     | $\pm$ 0.00063 | 0.402   | -0.00046                    | $\pm$ 0.00063 | 0.458   |

Abbreviations: TMT, Trail Making Test; SE, Standard Error.

<sup>a</sup>Associations are reported for a 10-unit increment in visit 1 flavonoid intake.

<sup>b</sup>Basic Model includes fixed effects for visit 1 flavonoid intake, time, and visit 1 flavonoid intake\*time.

<sup>c</sup>Demographic Model is the Basic Model adjusted for visit 1 age in years, age-squared, sex, race, poverty status, education in years, and Wide Range Achievement Test (WRAT) scores.

<sup>d</sup>Lifestyle Model is the Demographic Model adjusted for current smoking status, current drug use, and total energy intake at visit 1.

<sup>e</sup>Clinical Model is the Demographic Model adjusted for diabetes, hypertension, high cholesterol, the Center for Epidemiologic Studies Depression Scale (CES-D), and body mass index (BMI).

**Table S4. Association<sup>a</sup> between visit 1 flavonoid intake and ln(TMT-A) for White study participants 50+ years, HANDLS 2004-2020.**

|                                                                                                                   | Basic Model <sup>b</sup> |               |         | Demographic Model <sup>c</sup> |               |         | Lifestyle Model <sup>d</sup> |               |         | Clinical Model <sup>e</sup> |               |         |
|-------------------------------------------------------------------------------------------------------------------|--------------------------|---------------|---------|--------------------------------|---------------|---------|------------------------------|---------------|---------|-----------------------------|---------------|---------|
|                                                                                                                   | $\hat{\beta}$            | $\pm$ SE      | p-value | $\hat{\beta}$                  | $\pm$ SE      | p-value | $\hat{\beta}$                | $\pm$ SE      | p-value | $\hat{\beta}$               | $\pm$ SE      | p-value |
| <i>Flavonoid Main Effect: Association between visit 1 flavonoid intake and visit 1 ln(TMT-A)</i>                  |                          |               |         |                                |               |         |                              |               |         |                             |               |         |
| Total Flavonoids                                                                                                  | -0.00042                 | $\pm$ 0.00036 | 0.244   | -0.00023                       | $\pm$ 0.00034 | 0.498   | -0.00018                     | $\pm$ 0.00034 | 0.595   | -0.00028                    | $\pm$ 0.00035 | 0.419   |
| Flavones                                                                                                          | -0.03899                 | $\pm$ 0.17968 | 0.828   | 0.08152                        | $\pm$ 0.17650 | 0.644   | 0.13760                      | $\pm$ 0.17807 | 0.440   | 0.09815                     | $\pm$ 0.17540 | 0.576   |
| Flavonols                                                                                                         | -0.01047                 | $\pm$ 0.00919 | 0.255   | -0.00488                       | $\pm$ 0.00889 | 0.583   | -0.00217                     | $\pm$ 0.00895 | 0.809   | -0.00464                    | $\pm$ 0.00888 | 0.602   |
| Flavonones                                                                                                        | -0.01180                 | $\pm$ 0.00844 | 0.163   | -0.00834                       | $\pm$ 0.00830 | 0.316   | -0.00615                     | $\pm$ 0.00835 | 0.462   | -0.00856                    | $\pm$ 0.00827 | 0.300   |
| Flavan-3-ols                                                                                                      | -0.00037                 | $\pm$ 0.00037 | 0.313   | -0.00021                       | $\pm$ 0.00036 | 0.554   | -0.00017                     | $\pm$ 0.00036 | 0.636   | -0.00026                    | $\pm$ 0.00036 | 0.461   |
| Anthocyanidins                                                                                                    | -0.01384                 | $\pm$ 0.00755 | 0.068   | -0.00856                       | $\pm$ 0.00745 | 0.251   | -0.00710                     | $\pm$ 0.00749 | 0.343   | -0.00806                    | $\pm$ 0.00742 | 0.278   |
| <i>Flavonoid*Time Interaction: Association between visit 1 flavonoid intake and change in ln(TMT-A) over time</i> |                          |               |         |                                |               |         |                              |               |         |                             |               |         |
| Total Flavonoids                                                                                                  | 0.00005                  | $\pm$ 0.00005 | 0.357   | 0.00005                        | $\pm$ 0.00005 | 0.364   | 0.00005                      | $\pm$ 0.00005 | 0.333   | 0.00005                     | $\pm$ 0.00005 | 0.288   |
| Flavones                                                                                                          | -0.03308                 | $\pm$ 0.02759 | 0.231   | -0.03358                       | $\pm$ 0.02743 | 0.222   | -0.03229                     | $\pm$ 0.02749 | 0.240   | -0.03273                    | $\pm$ 0.02739 | 0.232   |
| Flavonols                                                                                                         | 0.00070                  | $\pm$ 0.00134 | 0.604   | 0.00066                        | $\pm$ 0.00133 | 0.619   | 0.00073                      | $\pm$ 0.00133 | 0.586   | 0.00071                     | $\pm$ 0.00133 | 0.592   |
| Flavonones                                                                                                        | 0.00109                  | $\pm$ 0.00138 | 0.430   | 0.00095                        | $\pm$ 0.00136 | 0.489   | 0.00089                      | $\pm$ 0.00136 | 0.512   | 0.00069                     | $\pm$ 0.00136 | 0.610   |
| Flavan-3-ols                                                                                                      | 0.00005                  | $\pm$ 0.00005 | 0.353   | 0.00005                        | $\pm$ 0.00005 | 0.354   | 0.00005                      | $\pm$ 0.00005 | 0.321   | 0.00006                     | $\pm$ 0.00005 | 0.281   |
| Anthocyanidins                                                                                                    | -0.00002                 | $\pm$ 0.00076 | 0.983   | -0.00016                       | $\pm$ 0.00076 | 0.832   | -0.00018                     | $\pm$ 0.00076 | 0.808   | -0.00009                    | $\pm$ 0.00076 | 0.905   |

Abbreviations: TMT, Trail Making Test; SE, Standard Error.

<sup>a</sup>Associations are reported for a 10-unit increment in visit 1 flavonoid intake.

<sup>b</sup>Basic Model includes fixed effects for visit 1 flavonoid intake, time, and visit 1 flavonoid intake\*time.

<sup>c</sup>Demographic Model is the Basic Model adjusted for visit 1 age in years, age-squared, sex, race, poverty status, education in years, and Wide Range Achievement Test (WRAT) scores.

<sup>d</sup>Lifestyle Model is the Demographic Model adjusted for current smoking status, current drug use, and total energy intake at visit 1.

<sup>e</sup>Clinical Model is the Demographic Model adjusted for diabetes, hypertension, high cholesterol, the Center for Epidemiologic Studies Depression Scale (CES-D), and body mass index (BMI).

**Table S5. Association<sup>a</sup> between visit 1 flavonoid intake and ln(TMT-A) for African American study participants 50+ years, HANDLS 2004-2020.**

|                                                                                                                   | Basic Model <sup>b</sup> |               |         | Demographic Model <sup>c</sup> |               |         | Lifestyle Model <sup>d</sup> |               |         | Clinical Model <sup>e</sup> |               |         |
|-------------------------------------------------------------------------------------------------------------------|--------------------------|---------------|---------|--------------------------------|---------------|---------|------------------------------|---------------|---------|-----------------------------|---------------|---------|
|                                                                                                                   | $\hat{\beta}$            | $\pm$ SE      | p-value | $\hat{\beta}$                  | $\pm$ SE      | p-value | $\hat{\beta}$                | $\pm$ SE      | p-value | $\hat{\beta}$               | $\pm$ SE      | p-value |
| <i>Flavonoid Main Effect: Association between visit 1 flavonoid intake and visit 1 ln(TMT-A)</i>                  |                          |               |         |                                |               |         |                              |               |         |                             |               |         |
| Total Flavonoids                                                                                                  | -0.00023                 | $\pm$ 0.00081 | 0.773   | -0.00011                       | $\pm$ 0.00078 | 0.884   | 0.00006                      | $\pm$ 0.00078 | 0.940   | 0.00007                     | $\pm$ 0.00077 | 0.929   |
| Flavones                                                                                                          | -0.11293                 | $\pm$ 0.30209 | 0.709   | 0.16562                        | $\pm$ 0.29551 | 0.575   | 0.28540                      | $\pm$ 0.29717 | 0.337   | 0.20953                     | $\pm$ 0.29352 | 0.475   |
| Flavonols                                                                                                         | -0.00766                 | $\pm$ 0.01382 | 0.580   | -0.00484                       | $\pm$ 0.01342 | 0.718   | 0.00794                      | $\pm$ 0.01410 | 0.573   | -0.00206                    | $\pm$ 0.01330 | 0.877   |
| Flavonones                                                                                                        | -0.00279                 | $\pm$ 0.00682 | 0.682   | -0.00049                       | $\pm$ 0.00654 | 0.941   | 0.00177                      | $\pm$ 0.00666 | 0.790   | -0.00012                    | $\pm$ 0.00649 | 0.986   |
| Flavan-3-ols                                                                                                      | -0.00022                 | $\pm$ 0.00085 | 0.801   | -0.00019                       | $\pm$ 0.00082 | 0.816   | -0.00012                     | $\pm$ 0.00081 | 0.886   | 0.00000                     | $\pm$ 0.00081 | 0.999   |
| Anthocyanidins                                                                                                    | -0.00163                 | $\pm$ 0.01008 | 0.872   | 0.00625                        | $\pm$ 0.00968 | 0.518   | 0.01138                      | $\pm$ 0.00980 | 0.246   | 0.00572                     | $\pm$ 0.00962 | 0.552   |
| <i>Flavonoid*Time Interaction: Association between visit 1 flavonoid intake and change in ln(TMT-A) over time</i> |                          |               |         |                                |               |         |                              |               |         |                             |               |         |
| Total Flavonoids                                                                                                  | 0.00010                  | $\pm$ 0.00010 | 0.333   | 0.00009                        | $\pm$ 0.00010 | 0.360   | 0.00011                      | $\pm$ 0.00010 | 0.294   | 0.00008                     | $\pm$ 0.00010 | 0.429   |
| Flavones                                                                                                          | 0.01800                  | $\pm$ 0.03831 | 0.639   | 0.01241                        | $\pm$ 0.03822 | 0.746   | 0.00931                      | $\pm$ 0.03820 | 0.808   | 0.01774                     | $\pm$ 0.03831 | 0.643   |
| Flavonols                                                                                                         | 0.00164                  | $\pm$ 0.00195 | 0.403   | 0.00165                        | $\pm$ 0.00195 | 0.397   | 0.00183                      | $\pm$ 0.00195 | 0.348   | 0.00142                     | $\pm$ 0.00195 | 0.464   |
| Flavonones                                                                                                        | -0.00109                 | $\pm$ 0.00085 | 0.199   | -0.00115                       | $\pm$ 0.00084 | 0.171   | -0.00113                     | $\pm$ 0.00084 | 0.178   | -0.00117                    | $\pm$ 0.00084 | 0.165   |
| Flavan-3-ols                                                                                                      | 0.00014                  | $\pm$ 0.00011 | 0.210   | 0.00013                        | $\pm$ 0.00011 | 0.227   | 0.00014                      | $\pm$ 0.00011 | 0.183   | 0.00012                     | $\pm$ 0.00011 | 0.284   |
| Anthocyanidins                                                                                                    | -0.00099                 | $\pm$ 0.00109 | 0.366   | -0.00107                       | $\pm$ 0.00109 | 0.328   | -0.00098                     | $\pm$ 0.00109 | 0.366   | -0.00092                    | $\pm$ 0.00109 | 0.397   |

Abbreviations: TMT, Trail Making Test; SE, Standard Error.

<sup>a</sup>Associations are reported for a 10-unit increment in visit 1 flavonoid intake.

<sup>b</sup>Basic Model includes fixed effects for visit 1 flavonoid intake, time, and visit 1 flavonoid intake\*time.

<sup>c</sup>Demographic Model is the Basic Model adjusted for visit 1 age in years, age-squared, sex, race, poverty status, education in years, and Wide Range Achievement Test (WRAT) scores.

<sup>d</sup>Lifestyle Model is the Demographic Model adjusted for current smoking status, current drug use, and total energy intake at visit 1.

<sup>e</sup>Clinical Model is the Demographic Model adjusted for diabetes, hypertension, high cholesterol, the Center for Epidemiologic Studies Depression Scale (CES-D), and body mass index (BMI).

**Table S6. Association<sup>a</sup> between visit 1 flavonoid intake and ln(TMT-B) for all study participants 50+ years, HANDLS 2004-2020.**

|                                                                                                                   | Basic Model <sup>b</sup> |               |         | Demographic Model <sup>c</sup> |               |         | Lifestyle Model <sup>d</sup> |               |         | Clinical Model <sup>e</sup> |               |         |
|-------------------------------------------------------------------------------------------------------------------|--------------------------|---------------|---------|--------------------------------|---------------|---------|------------------------------|---------------|---------|-----------------------------|---------------|---------|
|                                                                                                                   | $\hat{\beta}$            | $\pm$ SE      | p-value | $\hat{\beta}$                  | $\pm$ SE      | p-value | $\hat{\beta}$                | $\pm$ SE      | p-value | $\hat{\beta}$               | $\pm$ SE      | p-value |
| <i>Flavonoid Main Effect: Association between visit 1 flavonoid intake and visit 1 ln(TMT-B)</i>                  |                          |               |         |                                |               |         |                              |               |         |                             |               |         |
| Total Flavonoids                                                                                                  | -0.00104                 | $\pm$ 0.00057 | 0.067   | 0.00033                        | $\pm$ 0.00049 | 0.504   | 0.00039                      | $\pm$ 0.00049 | 0.431   | 0.00021                     | $\pm$ 0.00048 | 0.658   |
| Flavones                                                                                                          | -0.78640                 | $\pm$ 0.26593 | 0.003   | 0.10325                        | $\pm$ 0.23446 | 0.660   | 0.18130                      | $\pm$ 0.23660 | 0.444   | 0.16116                     | $\pm$ 0.23160 | 0.487   |
| Flavonols                                                                                                         | -0.02973                 | $\pm$ 0.01322 | 0.025   | 0.00792                        | $\pm$ 0.01150 | 0.491   | 0.01356                      | $\pm$ 0.01177 | 0.249   | 0.00771                     | $\pm$ 0.01134 | 0.497   |
| Flavonones                                                                                                        | 0.00316                  | $\pm$ 0.00926 | 0.733   | 0.01071                        | $\pm$ 0.00796 | 0.178   | 0.01370                      | $\pm$ 0.00807 | 0.090   | 0.01253                     | $\pm$ 0.00785 | 0.111   |
| Flavan-3-ols                                                                                                      | -0.00095                 | $\pm$ 0.00059 | 0.108   | 0.00030                        | $\pm$ 0.00051 | 0.550   | 0.00034                      | $\pm$ 0.00051 | 0.508   | 0.00016                     | $\pm$ 0.00050 | 0.745   |
| Anthocyanidins                                                                                                    | -0.03676                 | $\pm$ 0.01057 | 0.001   | -0.00436                       | $\pm$ 0.00922 | 0.636   | -0.00143                     | $\pm$ 0.00932 | 0.878   | -0.00100                    | $\pm$ 0.00912 | 0.913   |
| <i>Flavonoid*Time Interaction: Association between visit 1 flavonoid intake and change in ln(TMT-B) over time</i> |                          |               |         |                                |               |         |                              |               |         |                             |               |         |
| Total Flavonoids                                                                                                  | 0.00010                  | $\pm$ 0.00006 | 0.122   | 0.00009                        | $\pm$ 0.00006 | 0.166   | 0.00009                      | $\pm$ 0.00006 | 0.156   | 0.00008                     | $\pm$ 0.00006 | 0.199   |
| Flavones                                                                                                          | 0.00398                  | $\pm$ 0.03092 | 0.898   | 0.00473                        | $\pm$ 0.03071 | 0.878   | 0.00396                      | $\pm$ 0.03075 | 0.898   | 0.00429                     | $\pm$ 0.03069 | 0.889   |
| Flavonols                                                                                                         | 0.00190                  | $\pm$ 0.00152 | 0.212   | 0.00175                        | $\pm$ 0.00151 | 0.247   | 0.00180                      | $\pm$ 0.00151 | 0.234   | 0.00136                     | $\pm$ 0.00151 | 0.366   |
| Flavonones                                                                                                        | -0.00077                 | $\pm$ 0.00097 | 0.426   | -0.00102                       | $\pm$ 0.00096 | 0.288   | -0.00103                     | $\pm$ 0.00096 | 0.282   | -0.00130                    | $\pm$ 0.00096 | 0.175   |
| Flavan-3-ols                                                                                                      | 0.00011                  | $\pm$ 0.00007 | 0.104   | 0.00010                        | $\pm$ 0.00007 | 0.144   | 0.00010                      | $\pm$ 0.00007 | 0.135   | 0.00009                     | $\pm$ 0.00007 | 0.163   |
| Anthocyanidins                                                                                                    | 0.00014                  | $\pm$ 0.00085 | 0.873   | 0.00001                        | $\pm$ 0.00085 | 0.989   | -0.00003                     | $\pm$ 0.00085 | 0.976   | -0.00007                    | $\pm$ 0.00085 | 0.930   |

Abbreviations: TMT, Trail Making Test; SE, Standard Error.

<sup>a</sup>Associations are reported for a 10-unit increment in visit 1 flavonoid intake.

<sup>b</sup>Basic Model includes fixed effects for visit 1 flavonoid intake, time, and visit 1 flavonoid intake\*time.

<sup>c</sup>Demographic Model is the Basic Model adjusted for visit 1 age in years, age-squared, sex, race, poverty status, education in years, and Wide Range Achievement Test (WRAT) scores.

<sup>d</sup>Lifestyle Model is the Demographic Model adjusted for current smoking status, current drug use, and total energy intake at visit 1.

<sup>e</sup>Clinical Model is the Demographic Model adjusted for diabetes, hypertension, high cholesterol, the Center for Epidemiologic Studies Depression Scale (CES-D), and body mass index (BMI).

**Table S7. Association<sup>a</sup> between visit 1 flavonoid intake and ln(TMT-B) for White study participants 50+ years, HANDLS 2004-2020.**

|                                                                                                                   | Basic Model <sup>b</sup> |               |         | Demographic Model <sup>c</sup> |               |         | Lifestyle Model <sup>d</sup> |               |         | Clinical Model <sup>e</sup> |               |         |
|-------------------------------------------------------------------------------------------------------------------|--------------------------|---------------|---------|--------------------------------|---------------|---------|------------------------------|---------------|---------|-----------------------------|---------------|---------|
|                                                                                                                   | $\hat{\beta}$            | $\pm$ SE      | p-value | $\hat{\beta}$                  | $\pm$ SE      | p-value | $\hat{\beta}$                | $\pm$ SE      | p-value | $\hat{\beta}$               | $\pm$ SE      | p-value |
| <i>Flavonoid Main Effect: Association between visit 1 flavonoid intake and visit 1 ln(TMT-B)</i>                  |                          |               |         |                                |               |         |                              |               |         |                             |               |         |
| Total Flavonoids                                                                                                  | -0.00034                 | $\pm$ 0.00053 | 0.521   | -0.00002                       | $\pm$ 0.00049 | 0.966   | 0.00001                      | $\pm$ 0.00049 | 0.980   | -0.00013                    | $\pm$ 0.00049 | 0.795   |
| Flavones                                                                                                          | -0.58736                 | $\pm$ 0.26390 | 0.027   | -0.22680                       | $\pm$ 0.24842 | 0.362   | -0.17044                     | $\pm$ 0.25119 | 0.497   | -0.18233                    | $\pm$ 0.24680 | 0.460   |
| Flavonols                                                                                                         | -0.01459                 | $\pm$ 0.01362 | 0.285   | 0.00044                        | $\pm$ 0.01254 | 0.972   | 0.00288                      | $\pm$ 0.01265 | 0.820   | -0.00011                    | $\pm$ 0.01252 | 0.993   |
| Flavonones                                                                                                        | -0.02005                 | $\pm$ 0.01242 | 0.107   | -0.00091                       | $\pm$ 0.01168 | 0.938   | 0.00137                      | $\pm$ 0.01177 | 0.908   | 0.00050                     | $\pm$ 0.01163 | 0.966   |
| Flavan-3-ols                                                                                                      | -0.00020                 | $\pm$ 0.00055 | 0.716   | 0.00003                        | $\pm$ 0.00050 | 0.958   | 0.00005                      | $\pm$ 0.00050 | 0.923   | -0.00009                    | $\pm$ 0.00051 | 0.855   |
| Anthocyanidins                                                                                                    | -0.03814                 | $\pm$ 0.01114 | 0.001   | -0.01931                       | $\pm$ 0.01055 | 0.068   | -0.01750                     | $\pm$ 0.01062 | 0.099   | -0.01758                    | $\pm$ 0.01051 | 0.094   |
| <i>Flavonoid*Time Interaction: Association between visit 1 flavonoid intake and change in ln(TMT-B) over time</i> |                          |               |         |                                |               |         |                              |               |         |                             |               |         |
| Total Flavonoids                                                                                                  | 0.00011                  | $\pm$ 0.00007 | 0.094   | 0.00010                        | $\pm$ 0.00007 | 0.127   | 0.00010                      | $\pm$ 0.00007 | 0.123   | 0.00010                     | $\pm$ 0.00007 | 0.142   |
| Flavones                                                                                                          | 0.02177                  | $\pm$ 0.03544 | 0.539   | 0.02641                        | $\pm$ 0.03533 | 0.455   | 0.02748                      | $\pm$ 0.03542 | 0.438   | 0.02591                     | $\pm$ 0.03535 | 0.464   |
| Flavonols                                                                                                         | 0.00279                  | $\pm$ 0.00171 | 0.105   | 0.00255                        | $\pm$ 0.00171 | 0.136   | 0.00260                      | $\pm$ 0.00171 | 0.129   | 0.00225                     | $\pm$ 0.00171 | 0.190   |
| Flavonones                                                                                                        | 0.00066                  | $\pm$ 0.00179 | 0.714   | 0.00072                        | $\pm$ 0.00177 | 0.683   | 0.00072                      | $\pm$ 0.00178 | 0.685   | 0.00037                     | $\pm$ 0.00178 | 0.833   |
| Flavan-3-ols                                                                                                      | 0.00011                  | $\pm$ 0.00007 | 0.100   | 0.00010                        | $\pm$ 0.00007 | 0.133   | 0.00010                      | $\pm$ 0.00007 | 0.128   | 0.00010                     | $\pm$ 0.00007 | 0.146   |
| Anthocyanidins                                                                                                    | 0.00029                  | $\pm$ 0.00097 | 0.765   | 0.00013                        | $\pm$ 0.00097 | 0.890   | 0.00009                      | $\pm$ 0.00097 | 0.922   | 0.00017                     | $\pm$ 0.00097 | 0.863   |

Abbreviations: TMT, Trail Making Test; SE, Standard Error.

<sup>a</sup>Associations are reported for a 10-unit increment in visit 1 flavonoid intake.

<sup>b</sup>Basic Model includes fixed effects for visit 1 flavonoid intake, time, and visit 1 flavonoid intake\*time.

<sup>c</sup>Demographic Model is the Basic Model adjusted for visit 1 age in years, age-squared, sex, race, poverty status, education in years, and Wide Range Achievement Test (WRAT) scores.

<sup>d</sup>Lifestyle Model is the Demographic Model adjusted for current smoking status, current drug use, and total energy intake at visit 1.

<sup>e</sup>Clinical Model is the Demographic Model adjusted for diabetes, hypertension, high cholesterol, the Center for Epidemiologic Studies Depression Scale (CES-D), and body mass index (BMI).

**Table S8. Association<sup>a</sup> between visit 1 flavonoid intake and ln(TMT-B) for African American study participants 50+ years, HANDLS 2004-2020.**

|                                                                                                                   | Basic Model <sup>b</sup> |               |         | Demographic Model <sup>c</sup> |               |         | Lifestyle Model <sup>d</sup> |               |         | Clinical Model <sup>e</sup> |               |         |
|-------------------------------------------------------------------------------------------------------------------|--------------------------|---------------|---------|--------------------------------|---------------|---------|------------------------------|---------------|---------|-----------------------------|---------------|---------|
|                                                                                                                   | $\hat{\beta}$            | $\pm$ SE      | p-value | $\hat{\beta}$                  | $\pm$ SE      | p-value | $\hat{\beta}$                | $\pm$ SE      | p-value | $\hat{\beta}$               | $\pm$ SE      | p-value |
| <i>Flavonoid Main Effect: Association between visit 1 flavonoid intake and visit 1 ln(TMT-B)</i>                  |                          |               |         |                                |               |         |                              |               |         |                             |               |         |
| Total Flavonoids                                                                                                  | 0.00170                  | $\pm$ 0.00142 | 0.232   | 0.00225                        | $\pm$ 0.00128 | 0.079   | 0.00241                      | $\pm$ 0.00129 | 0.061   | 0.00253                     | $\pm$ 0.00126 | 0.045   |
| Flavones                                                                                                          | 0.03019                  | $\pm$ 0.53028 | 0.955   | 0.95456                        | $\pm$ 0.48897 | 0.051   | 1.08187                      | $\pm$ 0.49397 | 0.029   | 1.09100                     | $\pm$ 0.48170 | 0.024   |
| Flavonols                                                                                                         | 0.00757                  | $\pm$ 0.02422 | 0.755   | 0.02769                        | $\pm$ 0.02215 | 0.211   | 0.04114                      | $\pm$ 0.02352 | 0.080   | 0.03121                     | $\pm$ 0.02180 | 0.152   |
| Flavonones                                                                                                        | 0.00911                  | $\pm$ 0.01201 | 0.449   | 0.01650                        | $\pm$ 0.01084 | 0.128   | 0.01928                      | $\pm$ 0.01106 | 0.082   | 0.01845                     | $\pm$ 0.01068 | 0.084   |
| Flavan-3-ols                                                                                                      | 0.00168                  | $\pm$ 0.00150 | 0.263   | 0.00197                        | $\pm$ 0.00135 | 0.145   | 0.00203                      | $\pm$ 0.00135 | 0.134   | 0.00220                     | $\pm$ 0.00133 | 0.098   |
| Anthocyanidins                                                                                                    | 0.00367                  | $\pm$ 0.01790 | 0.838   | 0.02059                        | $\pm$ 0.01617 | 0.203   | 0.02567                      | $\pm$ 0.01647 | 0.119   | 0.02442                     | $\pm$ 0.01595 | 0.126   |
| <i>Flavonoid*Time Interaction: Association between visit 1 flavonoid intake and change in ln(TMT-B) over time</i> |                          |               |         |                                |               |         |                              |               |         |                             |               |         |
| Total Flavonoids                                                                                                  | -0.00006                 | $\pm$ 0.00015 | 0.696   | -0.00006                       | $\pm$ 0.00015 | 0.696   | -0.00005                     | $\pm$ 0.00015 | 0.734   | -0.00005                    | $\pm$ 0.00015 | 0.754   |
| Flavones                                                                                                          | -0.05359                 | $\pm$ 0.05422 | 0.323   | -0.05945                       | $\pm$ 0.05383 | 0.269   | -0.06266                     | $\pm$ 0.05395 | 0.245   | -0.06153                    | $\pm$ 0.05392 | 0.254   |
| Flavonols                                                                                                         | -0.00126                 | $\pm$ 0.00277 | 0.650   | -0.00112                       | $\pm$ 0.00275 | 0.684   | -0.00103                     | $\pm$ 0.00275 | 0.710   | -0.00127                    | $\pm$ 0.00275 | 0.645   |
| Flavonones                                                                                                        | -0.00124                 | $\pm$ 0.00120 | 0.300   | -0.00133                       | $\pm$ 0.00119 | 0.263   | -0.00134                     | $\pm$ 0.00119 | 0.261   | -0.00171                    | $\pm$ 0.00119 | 0.150   |
| Flavan-3-ols                                                                                                      | -0.00003                 | $\pm$ 0.00016 | 0.858   | -0.00003                       | $\pm$ 0.00016 | 0.862   | -0.00002                     | $\pm$ 0.00016 | 0.902   | -0.00001                    | $\pm$ 0.00016 | 0.973   |
| Anthocyanidins                                                                                                    | -0.00091                 | $\pm$ 0.00153 | 0.554   | -0.00099                       | $\pm$ 0.00152 | 0.515   | -0.00097                     | $\pm$ 0.00152 | 0.522   | -0.00125                    | $\pm$ 0.00152 | 0.413   |

Abbreviations: TMT, Trail Making Test; SE, Standard Error.

<sup>a</sup>Associations are reported for a 10-unit increment in visit 1 flavonoid intake.

<sup>b</sup>Basic Model includes fixed effects for visit 1 flavonoid intake, time, and visit 1 flavonoid intake\*time.

<sup>c</sup>Demographic Model is the Basic Model adjusted for visit 1 age in years, age-squared, sex, race, poverty status, education in years, and Wide Range Achievement Test (WRAT) scores.

<sup>d</sup>Lifestyle Model is the Demographic Model adjusted for current smoking status, current drug use, and total energy intake at visit 1.

<sup>e</sup>Clinical Model is the Demographic Model adjusted for diabetes, hypertension, high cholesterol, the Center for Epidemiologic Studies Depression Scale (CES-D), and body mass index (BMI).



**Table S9. Association<sup>a</sup> between visit 1 flavonoid intake and ln(TMT-A) for all study participants without MMSE exclusion, HANDLS 2004-2020.**

|                                                                                                                   | Basic Model <sup>b</sup> |               |         | Demographic Model <sup>c</sup> |               |         | Lifestyle Model <sup>d</sup> |               |         | Clinical Model <sup>e</sup> |               |         |
|-------------------------------------------------------------------------------------------------------------------|--------------------------|---------------|---------|--------------------------------|---------------|---------|------------------------------|---------------|---------|-----------------------------|---------------|---------|
|                                                                                                                   | $\hat{\beta}$            | $\pm$ SE      | p-value | $\hat{\beta}$                  | $\pm$ SE      | p-value | $\hat{\beta}$                | $\pm$ SE      | p-value | $\hat{\beta}$               | $\pm$ SE      | p-value |
| <i>Flavonoid Main Effect: Association between visit 1 flavonoid intake and visit 1 ln(TMT-A)</i>                  |                          |               |         |                                |               |         |                              |               |         |                             |               |         |
| Total Flavonoids                                                                                                  | -0.00050                 | $\pm$ 0.00020 | 0.012   | 0.00000                        | $\pm$ 0.00018 | 0.983   | 0.00004                      | $\pm$ 0.00018 | 0.807   | -0.00005                    | $\pm$ 0.00017 | 0.756   |
| Flavones                                                                                                          | -0.30914                 | $\pm$ 0.10076 | 0.002   | 0.03359                        | $\pm$ 0.09095 | 0.712   | 0.08347                      | $\pm$ 0.09151 | 0.362   | 0.04103                     | $\pm$ 0.09026 | 0.649   |
| Flavonols                                                                                                         | -0.01502                 | $\pm$ 0.00485 | 0.002   | -0.00236                       | $\pm$ 0.00435 | 0.587   | 0.00142                      | $\pm$ 0.00442 | 0.748   | -0.00309                    | $\pm$ 0.00431 | 0.474   |
| Flavonones                                                                                                        | -0.00237                 | $\pm$ 0.00363 | 0.513   | -0.00508                       | $\pm$ 0.00322 | 0.115   | -0.00354                     | $\pm$ 0.00324 | 0.274   | -0.00425                    | $\pm$ 0.00320 | 0.184   |
| Flavan-3-ols                                                                                                      | -0.00047                 | $\pm$ 0.00020 | 0.022   | 0.00003                        | $\pm$ 0.00018 | 0.872   | 0.00006                      | $\pm$ 0.00018 | 0.758   | -0.00004                    | $\pm$ 0.00018 | 0.840   |
| Anthocyanidins                                                                                                    | -0.01706                 | $\pm$ 0.00507 | 0.001   | -0.00492                       | $\pm$ 0.00457 | 0.281   | -0.00292                     | $\pm$ 0.00458 | 0.523   | -0.00376                    | $\pm$ 0.00454 | 0.408   |
| <i>Flavonoid*Time Interaction: Association between visit 1 flavonoid intake and change in ln(TMT-A) over time</i> |                          |               |         |                                |               |         |                              |               |         |                             |               |         |
| Total Flavonoids                                                                                                  | 0.00000                  | $\pm$ 0.00002 | 0.995   | -0.00001                       | $\pm$ 0.00002 | 0.810   | -0.00001                     | $\pm$ 0.00002 | 0.827   | -0.00001                    | $\pm$ 0.00002 | 0.818   |
| Flavones                                                                                                          | -0.01676                 | $\pm$ 0.01192 | 0.160   | -0.01989                       | $\pm$ 0.01182 | 0.092   | -0.02068                     | $\pm$ 0.01183 | 0.080   | -0.02001                    | $\pm$ 0.01182 | 0.091   |
| Flavonols                                                                                                         | 0.00022                  | $\pm$ 0.00059 | 0.708   | 0.00012                        | $\pm$ 0.00059 | 0.845   | 0.00015                      | $\pm$ 0.00059 | 0.804   | 0.00008                     | $\pm$ 0.00059 | 0.886   |
| Flavonones                                                                                                        | -0.00008                 | $\pm$ 0.00043 | 0.851   | -0.00019                       | $\pm$ 0.00043 | 0.657   | -0.00021                     | $\pm$ 0.00043 | 0.628   | -0.00015                    | $\pm$ 0.00043 | 0.724   |
| Flavan-3-ols                                                                                                      | 0.00000                  | $\pm$ 0.00002 | 0.965   | 0.00000                        | $\pm$ 0.00002 | 0.855   | 0.00000                      | $\pm$ 0.00002 | 0.870   | 0.00000                     | $\pm$ 0.00002 | 0.855   |
| Anthocyanidins                                                                                                    | -0.00001                 | $\pm$ 0.00050 | 0.988   | -0.00017                       | $\pm$ 0.00050 | 0.737   | -0.00017                     | $\pm$ 0.00050 | 0.737   | -0.00012                    | $\pm$ 0.00050 | 0.809   |

Abbreviations: TMT, Trail Making Test; MMSE, Mini-Mental State Exam; SE, Standard Error.

<sup>a</sup>Associations are reported for a 10-unit increment in visit 1 flavonoid intake.

<sup>b</sup>Basic Model includes fixed effects for visit 1 flavonoid intake, time, and visit 1 flavonoid intake\*time.

<sup>c</sup>Demographic Model is the Basic Model adjusted for visit 1 age in years, age-squared, sex, race, poverty status, education in years, and Wide Range Achievement Test (WRAT) scores.

<sup>d</sup>Lifestyle Model is the Demographic Model adjusted for current smoking status, current drug use, and total energy intake at visit 1.

<sup>e</sup>Clinical Model is the Demographic Model adjusted for diabetes, hypertension, high cholesterol, the Center for Epidemiologic Studies Depression Scale (CES-D), and body mass index (BMI).

**Table S10. Association<sup>a</sup> between visit 1 flavonoid intake and ln(TMT-A) for White study participants without MMSE exclusion, HANDLS 2004-2020.**

|                                                                                                                   | Basic Model <sup>b</sup> |               |         | Demographic Model <sup>c</sup> |               |         | Lifestyle Model <sup>d</sup> |               |         | Clinical Model <sup>e</sup> |               |         |
|-------------------------------------------------------------------------------------------------------------------|--------------------------|---------------|---------|--------------------------------|---------------|---------|------------------------------|---------------|---------|-----------------------------|---------------|---------|
|                                                                                                                   | $\hat{\beta}$            | $\pm$ SE      | p-value | $\hat{\beta}$                  | $\pm$ SE      | p-value | $\hat{\beta}$                | $\pm$ SE      | p-value | $\hat{\beta}$               | $\pm$ SE      | p-value |
| <i>Flavonoid Main Effect: Association between visit 1 flavonoid intake and visit 1 ln(TMT-A)</i>                  |                          |               |         |                                |               |         |                              |               |         |                             |               |         |
| Total Flavonoids                                                                                                  | -0.00007                 | $\pm$ 0.00020 | 0.727   | 0.00003                        | $\pm$ 0.00018 | 0.881   | 0.00005                      | $\pm$ 0.00018 | 0.769   | -0.00002                    | $\pm$ 0.00018 | 0.899   |
| Flavones                                                                                                          | -0.17236                 | $\pm$ 0.11441 | 0.132   | -0.00599                       | $\pm$ 0.10708 | 0.955   | 0.03532                      | $\pm$ 0.10779 | 0.743   | 0.00053                     | $\pm$ 0.10634 | 0.996   |
| Flavonols                                                                                                         | -0.00455                 | $\pm$ 0.00522 | 0.383   | -0.00030                       | $\pm$ 0.00480 | 0.950   | 0.00179                      | $\pm$ 0.00483 | 0.711   | -0.00113                    | $\pm$ 0.00477 | 0.813   |
| Flavonones                                                                                                        | -0.00215                 | $\pm$ 0.00578 | 0.710   | -0.00299                       | $\pm$ 0.00535 | 0.576   | -0.00162                     | $\pm$ 0.00537 | 0.763   | -0.00233                    | $\pm$ 0.00533 | 0.663   |
| Flavan-3-ols                                                                                                      | -0.00004                 | $\pm$ 0.00020 | 0.843   | 0.00004                        | $\pm$ 0.00019 | 0.820   | 0.00006                      | $\pm$ 0.00019 | 0.733   | -0.00002                    | $\pm$ 0.00019 | 0.934   |
| Anthocyanidins                                                                                                    | -0.01735                 | $\pm$ 0.00582 | 0.003   | -0.00887                       | $\pm$ 0.00554 | 0.109   | -0.00780                     | $\pm$ 0.00555 | 0.160   | -0.00870                    | $\pm$ 0.00552 | 0.115   |
| <i>Flavonoid*Time Interaction: Association between visit 1 flavonoid intake and change in ln(TMT-A) over time</i> |                          |               |         |                                |               |         |                              |               |         |                             |               |         |
| Total Flavonoids                                                                                                  | -0.00001                 | $\pm$ 0.00002 | 0.768   | -0.00001                       | $\pm$ 0.00002 | 0.666   | -0.00001                     | $\pm$ 0.00002 | 0.663   | 0.00000                     | $\pm$ 0.00002 | 0.838   |
| Flavones                                                                                                          | -0.03119                 | $\pm$ 0.01472 | 0.034   | -0.03098                       | $\pm$ 0.01470 | 0.035   | -0.03108                     | $\pm$ 0.01472 | 0.035   | -0.02989                    | $\pm$ 0.01467 | 0.042   |
| Flavonols                                                                                                         | -0.00034                 | $\pm$ 0.00064 | 0.596   | -0.00040                       | $\pm$ 0.00064 | 0.535   | -0.00038                     | $\pm$ 0.00064 | 0.556   | -0.00027                    | $\pm$ 0.00064 | 0.673   |
| Flavonones                                                                                                        | 0.00098                  | $\pm$ 0.00083 | 0.237   | 0.00096                        | $\pm$ 0.00082 | 0.240   | 0.00090                      | $\pm$ 0.00082 | 0.270   | 0.00094                     | $\pm$ 0.00082 | 0.249   |
| Flavan-3-ols                                                                                                      | -0.00001                 | $\pm$ 0.00002 | 0.772   | -0.00001                       | $\pm$ 0.00002 | 0.675   | -0.00001                     | $\pm$ 0.00002 | 0.672   | 0.00000                     | $\pm$ 0.00002 | 0.842   |
| Anthocyanidins                                                                                                    | -0.00006                 | $\pm$ 0.00060 | 0.915   | -0.00026                       | $\pm$ 0.00060 | 0.667   | -0.00027                     | $\pm$ 0.00060 | 0.657   | -0.00020                    | $\pm$ 0.00060 | 0.732   |

Abbreviations: TMT, Trail Making Test; MMSE, Mini-Mental State Exam; SE, Standard Error.

<sup>a</sup>Associations are reported for a 10-unit increment in visit 1 flavonoid intake.

<sup>b</sup>Basic Model includes fixed effects for visit 1 flavonoid intake, time, and visit 1 flavonoid intake\*time.

<sup>c</sup>Demographic Model is the Basic Model adjusted for visit 1 age in years, age-squared, sex, race, poverty status, education in years, and Wide Range Achievement Test (WRAT) scores.

<sup>d</sup>Lifestyle Model is the Demographic Model adjusted for current smoking status, current drug use, and total energy intake at visit 1.

<sup>e</sup>Clinical Model is the Demographic Model adjusted for diabetes, hypertension, high cholesterol, the Center for Epidemiologic Studies Depression Scale (CES-D), and body mass index (BMI).

**Table S11. Association<sup>a</sup> between visit 1 flavonoid intake and ln(TMT-A) for African American study participants without MMSE exclusion, HANDLS 2004-2020.**

|                                                                                                                   | Basic Model <sup>b</sup> |               |         | Demographic Model <sup>c</sup> |               |         | Lifestyle Model <sup>d</sup> |               |         | Clinical Model <sup>e</sup> |               |         |
|-------------------------------------------------------------------------------------------------------------------|--------------------------|---------------|---------|--------------------------------|---------------|---------|------------------------------|---------------|---------|-----------------------------|---------------|---------|
|                                                                                                                   | $\hat{\beta}$            | $\pm$ SE      | p-value | $\hat{\beta}$                  | $\pm$ SE      | p-value | $\hat{\beta}$                | $\pm$ SE      | p-value | $\hat{\beta}$               | $\pm$ SE      | p-value |
| <i>Flavonoid Main Effect: Association between visit 1 flavonoid intake and visit 1 ln(TMT-A)</i>                  |                          |               |         |                                |               |         |                              |               |         |                             |               |         |
| Total Flavonoids                                                                                                  | -0.00057                 | $\pm$ 0.00048 | 0.230   | -0.00020                       | $\pm$ 0.00043 | 0.647   | -0.00010                     | $\pm$ 0.00043 | 0.817   | -0.00017                    | $\pm$ 0.00043 | 0.700   |
| Flavones                                                                                                          | -0.14196                 | $\pm$ 0.17133 | 0.408   | 0.07716                        | $\pm$ 0.15538 | 0.620   | 0.13957                      | $\pm$ 0.15657 | 0.373   | 0.07875                     | $\pm$ 0.15417 | 0.610   |
| Flavonols                                                                                                         | -0.01430                 | $\pm$ 0.00922 | 0.121   | -0.00888                       | $\pm$ 0.00841 | 0.291   | -0.00149                     | $\pm$ 0.00878 | 0.866   | -0.00818                    | $\pm$ 0.00835 | 0.327   |
| Flavonones                                                                                                        | -0.00761                 | $\pm$ 0.00452 | 0.092   | -0.00536                       | $\pm$ 0.00407 | 0.187   | -0.00394                     | $\pm$ 0.00410 | 0.337   | -0.00500                    | $\pm$ 0.00404 | 0.216   |
| Flavan-3-ols                                                                                                      | -0.00048                 | $\pm$ 0.00050 | 0.338   | -0.00014                       | $\pm$ 0.00045 | 0.760   | -0.00008                     | $\pm$ 0.00045 | 0.854   | -0.00011                    | $\pm$ 0.00045 | 0.803   |
| Anthocyanidins                                                                                                    | -0.00272                 | $\pm$ 0.00834 | 0.745   | 0.00011                        | $\pm$ 0.00751 | 0.988   | 0.00341                      | $\pm$ 0.00757 | 0.653   | 0.00070                     | $\pm$ 0.00746 | 0.925   |
| <i>Flavonoid*Time Interaction: Association between visit 1 flavonoid intake and change in ln(TMT-A) over time</i> |                          |               |         |                                |               |         |                              |               |         |                             |               |         |
| Total Flavonoids                                                                                                  | 0.00004                  | $\pm$ 0.00006 | 0.498   | 0.00003                        | $\pm$ 0.00006 | 0.615   | 0.00003                      | $\pm$ 0.00006 | 0.595   | 0.00002                     | $\pm$ 0.00006 | 0.770   |
| Flavones                                                                                                          | -0.00290                 | $\pm$ 0.01847 | 0.875   | -0.00817                       | $\pm$ 0.01828 | 0.655   | -0.01010                     | $\pm$ 0.01832 | 0.581   | -0.00966                    | $\pm$ 0.01830 | 0.598   |
| Flavonols                                                                                                         | 0.00158                  | $\pm$ 0.00113 | 0.164   | 0.00146                        | $\pm$ 0.00112 | 0.193   | 0.00147                      | $\pm$ 0.00112 | 0.188   | 0.00119                     | $\pm$ 0.00112 | 0.287   |
| Flavonones                                                                                                        | -0.00037                 | $\pm$ 0.00053 | 0.484   | -0.00054                       | $\pm$ 0.00052 | 0.297   | -0.00055                     | $\pm$ 0.00052 | 0.289   | -0.00050                    | $\pm$ 0.00052 | 0.331   |
| Flavan-3-ols                                                                                                      | 0.00004                  | $\pm$ 0.00006 | 0.464   | 0.00003                        | $\pm$ 0.00006 | 0.553   | 0.00004                      | $\pm$ 0.00006 | 0.535   | 0.00002                     | $\pm$ 0.00006 | 0.714   |
| Anthocyanidins                                                                                                    | 0.00005                  | $\pm$ 0.00081 | 0.952   | 0.00009                        | $\pm$ 0.00080 | 0.911   | 0.00008                      | $\pm$ 0.00080 | 0.916   | 0.00011                     | $\pm$ 0.00080 | 0.889   |

Abbreviations: TMT, Trail Making Test; MMSE, Mini-Mental State Exam; SE, Standard Error.

<sup>a</sup>Associations are reported for a 10-unit increment in visit 1 flavonoid intake.

<sup>b</sup>Basic Model includes fixed effects for visit 1 flavonoid intake, time, and visit 1 flavonoid intake\*time.

<sup>c</sup>Demographic Model is the Basic Model adjusted for visit 1 age in years, age-squared, sex, race, poverty status, education in years, and Wide Range Achievement Test (WRAT) scores.

<sup>d</sup>Lifestyle Model is the Demographic Model adjusted for current smoking status, current drug use, and total energy intake at visit 1.

<sup>e</sup>Clinical Model is the Demographic Model adjusted for diabetes, hypertension, high cholesterol, the Center for Epidemiologic Studies Depression Scale (CES-D), and body mass index (BMI).

**Table S12. Association<sup>a</sup> between visit 1 flavonoid intake and ln(TMT-B) for all study participants without MMSE exclusion, HANDLS 2004-2020.**

|                                                                                                                   | Basic Model <sup>b</sup> |               |         | Demographic Model <sup>c</sup> |               |         | Lifestyle Model <sup>d</sup> |               |         | Clinical Model <sup>e</sup> |               |         |
|-------------------------------------------------------------------------------------------------------------------|--------------------------|---------------|---------|--------------------------------|---------------|---------|------------------------------|---------------|---------|-----------------------------|---------------|---------|
|                                                                                                                   | $\hat{\beta}$            | $\pm$ SE      | p-value | $\hat{\beta}$                  | $\pm$ SE      | p-value | $\hat{\beta}$                | $\pm$ SE      | p-value | $\hat{\beta}$               | $\pm$ SE      | p-value |
| <i>Flavonoid Main Effect: Association between visit 1 flavonoid intake and visit 1 ln(TMT-B)</i>                  |                          |               |         |                                |               |         |                              |               |         |                             |               |         |
| Total Flavonoids                                                                                                  | -0.00120                 | $\pm$ 0.00032 | <0.001  | -0.00024                       | $\pm$ 0.00027 | 0.368   | -0.00019                     | $\pm$ 0.00027 | 0.477   | -0.00029                    | $\pm$ 0.00026 | 0.268   |
| Flavones                                                                                                          | -1.03293                 | $\pm$ 0.16506 | <0.001  | -0.21236                       | $\pm$ 0.13782 | 0.123   | -0.14283                     | $\pm$ 0.13888 | 0.304   | -0.18034                    | $\pm$ 0.13612 | 0.185   |
| Flavonols                                                                                                         | -0.03209                 | $\pm$ 0.00798 | <0.001  | -0.00462                       | $\pm$ 0.00658 | 0.483   | 0.00083                      | $\pm$ 0.00671 | 0.901   | -0.00473                    | $\pm$ 0.00650 | 0.467   |
| Flavonones                                                                                                        | 0.00618                  | $\pm$ 0.00597 | 0.301   | 0.00310                        | $\pm$ 0.00487 | 0.524   | 0.00556                      | $\pm$ 0.00491 | 0.257   | 0.00492                     | $\pm$ 0.00482 | 0.307   |
| Flavan-3-ols                                                                                                      | -0.00117                 | $\pm$ 0.00034 | 0.001   | -0.00025                       | $\pm$ 0.00028 | 0.370   | -0.00022                     | $\pm$ 0.00028 | 0.434   | -0.00031                    | $\pm$ 0.00027 | 0.249   |
| Anthocyanidins                                                                                                    | -0.03891                 | $\pm$ 0.00833 | <0.001  | -0.00498                       | $\pm$ 0.00693 | 0.472   | -0.00194                     | $\pm$ 0.00696 | 0.780   | -0.00205                    | $\pm$ 0.00685 | 0.765   |
| <i>Flavonoid*Time Interaction: Association between visit 1 flavonoid intake and change in ln(TMT-B) over time</i> |                          |               |         |                                |               |         |                              |               |         |                             |               |         |
| Total Flavonoids                                                                                                  | 0.00006                  | $\pm$ 0.00003 | 0.051   | 0.00005                        | $\pm$ 0.00003 | 0.096   | 0.00005                      | $\pm$ 0.00003 | 0.092   | 0.00005                     | $\pm$ 0.00003 | 0.122   |
| Flavones                                                                                                          | 0.01908                  | $\pm$ 0.01605 | 0.235   | 0.01657                        | $\pm$ 0.01588 | 0.297   | 0.01560                      | $\pm$ 0.01590 | 0.326   | 0.01601                     | $\pm$ 0.01587 | 0.313   |
| Flavonols                                                                                                         | 0.00158                  | $\pm$ 0.00080 | 0.049   | 0.00141                        | $\pm$ 0.00079 | 0.076   | 0.00144                      | $\pm$ 0.00079 | 0.070   | 0.00121                     | $\pm$ 0.00079 | 0.128   |
| Flavonones                                                                                                        | -0.00018                 | $\pm$ 0.00058 | 0.752   | -0.00033                       | $\pm$ 0.00057 | 0.558   | -0.00036                     | $\pm$ 0.00057 | 0.534   | -0.00037                    | $\pm$ 0.00057 | 0.518   |
| Flavan-3-ols                                                                                                      | 0.00007                  | $\pm$ 0.00003 | 0.053   | 0.00006                        | $\pm$ 0.00003 | 0.097   | 0.00006                      | $\pm$ 0.00003 | 0.094   | 0.00005                     | $\pm$ 0.00003 | 0.122   |
| Anthocyanidins                                                                                                    | 0.00056                  | $\pm$ 0.00068 | 0.411   | 0.00038                        | $\pm$ 0.00067 | 0.568   | 0.00037                      | $\pm$ 0.00067 | 0.583   | 0.00037                     | $\pm$ 0.00066 | 0.581   |

Abbreviations: TMT, Trail Making Test; MMSE, Mini-Mental State Exam; SE, Standard Error.

<sup>a</sup>Associations are reported for a 10-unit increment in visit 1 flavonoid intake.

<sup>b</sup>Basic Model includes fixed effects for visit 1 flavonoid intake, time, and visit 1 flavonoid intake\*time.

<sup>c</sup>Demographic Model is the Basic Model adjusted for visit 1 age in years, age-squared, sex, race, poverty status, education in years, and Wide Range Achievement Test (WRAT) scores.

<sup>d</sup>Lifestyle Model is the Demographic Model adjusted for current smoking status, current drug use, and total energy intake at visit 1.

<sup>e</sup>Clinical Model is the Demographic Model adjusted for diabetes, hypertension, high cholesterol, the Center for Epidemiologic Studies Depression Scale (CES-D), and body mass index (BMI).

**Table S13. Association<sup>a</sup> between visit 1 flavonoid intake and ln(TMT-B) for White study participants without MMSE exclusion, HANDLS 2004-2020.**

|                                                                                                                   | Basic Model <sup>b</sup> |               |         | Demographic Model <sup>c</sup> |               |         | Lifestyle Model <sup>d</sup> |               |         | Clinical Model <sup>e</sup> |               |         |
|-------------------------------------------------------------------------------------------------------------------|--------------------------|---------------|---------|--------------------------------|---------------|---------|------------------------------|---------------|---------|-----------------------------|---------------|---------|
|                                                                                                                   | $\hat{\beta}$            | $\pm$ SE      | p-value | $\hat{\beta}$                  | $\pm$ SE      | p-value | $\hat{\beta}$                | $\pm$ SE      | p-value | $\hat{\beta}$               | $\pm$ SE      | p-value |
| <i>Flavonoid Main Effect: Association between visit 1 flavonoid intake and visit 1 ln(TMT-B)</i>                  |                          |               |         |                                |               |         |                              |               |         |                             |               |         |
| Total Flavonoids                                                                                                  | -0.00037                 | $\pm$ 0.00033 | 0.261   | -0.00024                       | $\pm$ 0.00027 | 0.371   | -0.00021                     | $\pm$ 0.00027 | 0.426   | -0.00030                    | $\pm$ 0.00027 | 0.265   |
| Flavones                                                                                                          | -0.85911                 | $\pm$ 0.18808 | <0.001  | -0.38499                       | $\pm$ 0.15796 | 0.015   | -0.33718                     | $\pm$ 0.15939 | 0.034   | -0.35813                    | $\pm$ 0.15662 | 0.022   |
| Flavonols                                                                                                         | -0.01578                 | $\pm$ 0.00866 | 0.069   | -0.00517                       | $\pm$ 0.00710 | 0.467   | -0.00265                     | $\pm$ 0.00717 | 0.712   | -0.00570                    | $\pm$ 0.00705 | 0.418   |
| Flavonones                                                                                                        | -0.01029                 | $\pm$ 0.00955 | 0.282   | -0.00692                       | $\pm$ 0.00789 | 0.381   | -0.00515                     | $\pm$ 0.00793 | 0.516   | -0.00413                    | $\pm$ 0.00785 | 0.599   |
| Flavan-3-ols                                                                                                      | -0.00028                 | $\pm$ 0.00034 | 0.407   | -0.00021                       | $\pm$ 0.00028 | 0.447   | -0.00019                     | $\pm$ 0.00028 | 0.491   | -0.00028                    | $\pm$ 0.00028 | 0.314   |
| Anthocyanidins                                                                                                    | -0.05140                 | $\pm$ 0.00958 | <0.001  | -0.02115                       | $\pm$ 0.00820 | 0.010   | -0.01957                     | $\pm$ 0.00824 | 0.018   | -0.01916                    | $\pm$ 0.00817 | 0.019   |
| <i>Flavonoid*Time Interaction: Association between visit 1 flavonoid intake and change in ln(TMT-B) over time</i> |                          |               |         |                                |               |         |                              |               |         |                             |               |         |
| Total Flavonoids                                                                                                  | 0.00005                  | $\pm$ 0.00003 | 0.128   | 0.00004                        | $\pm$ 0.00003 | 0.241   | 0.00004                      | $\pm$ 0.00003 | 0.235   | 0.00004                     | $\pm$ 0.00003 | 0.247   |
| Flavones                                                                                                          | 0.02823                  | $\pm$ 0.01963 | 0.151   | 0.02640                        | $\pm$ 0.01947 | 0.175   | 0.02622                      | $\pm$ 0.01951 | 0.179   | 0.02872                     | $\pm$ 0.01941 | 0.139   |
| Flavonols                                                                                                         | 0.00150                  | $\pm$ 0.00086 | 0.083   | 0.00117                        | $\pm$ 0.00085 | 0.170   | 0.00120                      | $\pm$ 0.00085 | 0.160   | 0.00110                     | $\pm$ 0.00085 | 0.197   |
| Flavonones                                                                                                        | 0.00086                  | $\pm$ 0.00112 | 0.441   | 0.00081                        | $\pm$ 0.00110 | 0.461   | 0.00079                      | $\pm$ 0.00110 | 0.474   | 0.00074                     | $\pm$ 0.00109 | 0.501   |
| Flavan-3-ols                                                                                                      | 0.00005                  | $\pm$ 0.00003 | 0.153   | 0.00004                        | $\pm$ 0.00003 | 0.278   | 0.00004                      | $\pm$ 0.00003 | 0.271   | 0.00004                     | $\pm$ 0.00003 | 0.282   |
| Anthocyanidins                                                                                                    | 0.00131                  | $\pm$ 0.00081 | 0.105   | 0.00108                        | $\pm$ 0.00080 | 0.174   | 0.00106                      | $\pm$ 0.00080 | 0.186   | 0.00106                     | $\pm$ 0.00079 | 0.184   |

Abbreviations: TMT, Trail Making Test; MMSE, Mini-Mental State Exam; SE, Standard Error.

<sup>a</sup>Associations are reported for a 10-unit increment in visit 1 flavonoid intake.

<sup>b</sup>Basic Model includes fixed effects for visit 1 flavonoid intake, time, and visit 1 flavonoid intake\*time.

<sup>c</sup>Demographic Model is the Basic Model adjusted for visit 1 age in years, age-squared, sex, race, poverty status, education in years, and Wide Range Achievement Test (WRAT) scores.

<sup>d</sup>Lifestyle Model is the Demographic Model adjusted for current smoking status, current drug use, and total energy intake at visit 1.

<sup>e</sup>Clinical Model is the Demographic Model adjusted for diabetes, hypertension, high cholesterol, the Center for Epidemiologic Studies Depression Scale (CES-D), and body mass index (BMI).

**Table S14. Association<sup>a</sup> between visit 1 flavonoid intake and ln(TMT-B) for African American study participants without MMSE exclusion, HANDLS 2004-2020.**

|                                                                                                                   | Basic Model <sup>b</sup> |               |         | Demographic Model <sup>c</sup> |               |         | Lifestyle Model <sup>d</sup> |               |         | Clinical Model <sup>e</sup> |               |         |
|-------------------------------------------------------------------------------------------------------------------|--------------------------|---------------|---------|--------------------------------|---------------|---------|------------------------------|---------------|---------|-----------------------------|---------------|---------|
|                                                                                                                   | $\hat{\beta}$            | $\pm$ SE      | p-value | $\hat{\beta}$                  | $\pm$ SE      | p-value | $\hat{\beta}$                | $\pm$ SE      | p-value | $\hat{\beta}$               | $\pm$ SE      | p-value |
| <i>Flavonoid Main Effect: Association between visit 1 flavonoid intake and visit 1 ln(TMT-B)</i>                  |                          |               |         |                                |               |         |                              |               |         |                             |               |         |
| Total Flavonoids                                                                                                  | -0.00090                 | $\pm$ 0.00076 | 0.241   | -0.00001                       | $\pm$ 0.00066 | 0.993   | 0.00016                      | $\pm$ 0.00066 | 0.813   | 0.00012                     | $\pm$ 0.00065 | 0.858   |
| Flavones                                                                                                          | -0.51534                 | $\pm$ 0.27456 | 0.061   | 0.05560                        | $\pm$ 0.23864 | 0.816   | 0.15961                      | $\pm$ 0.24053 | 0.507   | 0.08918                     | $\pm$ 0.23524 | 0.705   |
| Flavonols                                                                                                         | -0.01469                 | $\pm$ 0.01473 | 0.319   | 0.00047                        | $\pm$ 0.01286 | 0.971   | 0.01354                      | $\pm$ 0.01345 | 0.314   | 0.00277                     | $\pm$ 0.01267 | 0.827   |
| Flavonones                                                                                                        | 0.00269                  | $\pm$ 0.00725 | 0.710   | 0.00751                        | $\pm$ 0.00624 | 0.228   | 0.01040                      | $\pm$ 0.00629 | 0.098   | 0.00839                     | $\pm$ 0.00615 | 0.172   |
| Flavan-3-ols                                                                                                      | -0.00097                 | $\pm$ 0.00080 | 0.224   | -0.00017                       | $\pm$ 0.00069 | 0.800   | -0.00008                     | $\pm$ 0.00069 | 0.901   | -0.00007                    | $\pm$ 0.00068 | 0.916   |
| Anthocyanidins                                                                                                    | 0.01040                  | $\pm$ 0.01333 | 0.435   | 0.01971                        | $\pm$ 0.01148 | 0.086   | 0.02555                      | $\pm$ 0.01157 | 0.027   | 0.02211                     | $\pm$ 0.01132 | 0.051   |
| <i>Flavonoid*Time Interaction: Association between visit 1 flavonoid intake and change in ln(TMT-B) over time</i> |                          |               |         |                                |               |         |                              |               |         |                             |               |         |
| Total Flavonoids                                                                                                  | 0.00007                  | $\pm$ 0.00008 | 0.386   | 0.00006                        | $\pm$ 0.00008 | 0.415   | 0.00006                      | $\pm$ 0.00008 | 0.401   | 0.00005                     | $\pm$ 0.00008 | 0.537   |
| Flavones                                                                                                          | -0.00244                 | $\pm$ 0.02504 | 0.922   | -0.00501                       | $\pm$ 0.02480 | 0.840   | -0.00799                     | $\pm$ 0.02485 | 0.748   | -0.00864                    | $\pm$ 0.02486 | 0.728   |
| Flavonols                                                                                                         | 0.00104                  | $\pm$ 0.00154 | 0.499   | 0.00113                        | $\pm$ 0.00152 | 0.457   | 0.00117                      | $\pm$ 0.00152 | 0.444   | 0.00069                     | $\pm$ 0.00152 | 0.653   |
| Flavonones                                                                                                        | -0.00028                 | $\pm$ 0.00070 | 0.689   | -0.00048                       | $\pm$ 0.00070 | 0.489   | -0.00050                     | $\pm$ 0.00070 | 0.468   | -0.00050                    | $\pm$ 0.00070 | 0.471   |
| Flavan-3-ols                                                                                                      | 0.00008                  | $\pm$ 0.00008 | 0.328   | 0.00008                        | $\pm$ 0.00008 | 0.344   | 0.00008                      | $\pm$ 0.00008 | 0.331   | 0.00006                     | $\pm$ 0.00008 | 0.448   |
| Anthocyanidins                                                                                                    | -0.00097                 | $\pm$ 0.00108 | 0.368   | -0.00094                       | $\pm$ 0.00107 | 0.380   | -0.00097                     | $\pm$ 0.00107 | 0.365   | -0.00096                    | $\pm$ 0.00107 | 0.368   |

Abbreviations: TMT, Trail Making Test; MMSE, Mini-Mental State Exam; SE, Standard Error.

<sup>a</sup>Associations are reported for a 10-unit increment in visit 1 flavonoid intake.

<sup>b</sup>Basic Model includes fixed effects for visit 1 flavonoid intake, time, and visit 1 flavonoid intake\*time.

<sup>c</sup>Demographic Model is the Basic Model adjusted for visit 1 age in years, age-squared, sex, race, poverty status, education in years, and Wide Range Achievement Test (WRAT) scores.

<sup>d</sup>Lifestyle Model is the Demographic Model adjusted for current smoking status, current drug use, and total energy intake at visit 1.

<sup>e</sup>Clinical Model is the Demographic Model adjusted for diabetes, hypertension, high cholesterol, the Center for Epidemiologic Studies Depression Scale (CES-D), and body mass index (BMI).
